# Supplementary material for: β-elemene alleviates airway stenosis via the ILK/Akt pathway modulated by MIR143HG sponging miR-1275
Source: PubMed Central journal article supplement (PMC8199800; doi:10.1186/s11658-021-00261-0), 2021-06-12

## Supplementary Information

### ***$\beta$ -Elemene Alleviate Post-traumatic Airway Stenosis via ILK/Akt Pathway***

#### ***Modulated by MIR143HG Sponging miR-1275***

Supplementary Information: The original, unprocessed versions of immunoblot membranes in Fig. 2, Fig.5 and Fig. 9.

## Figure 2

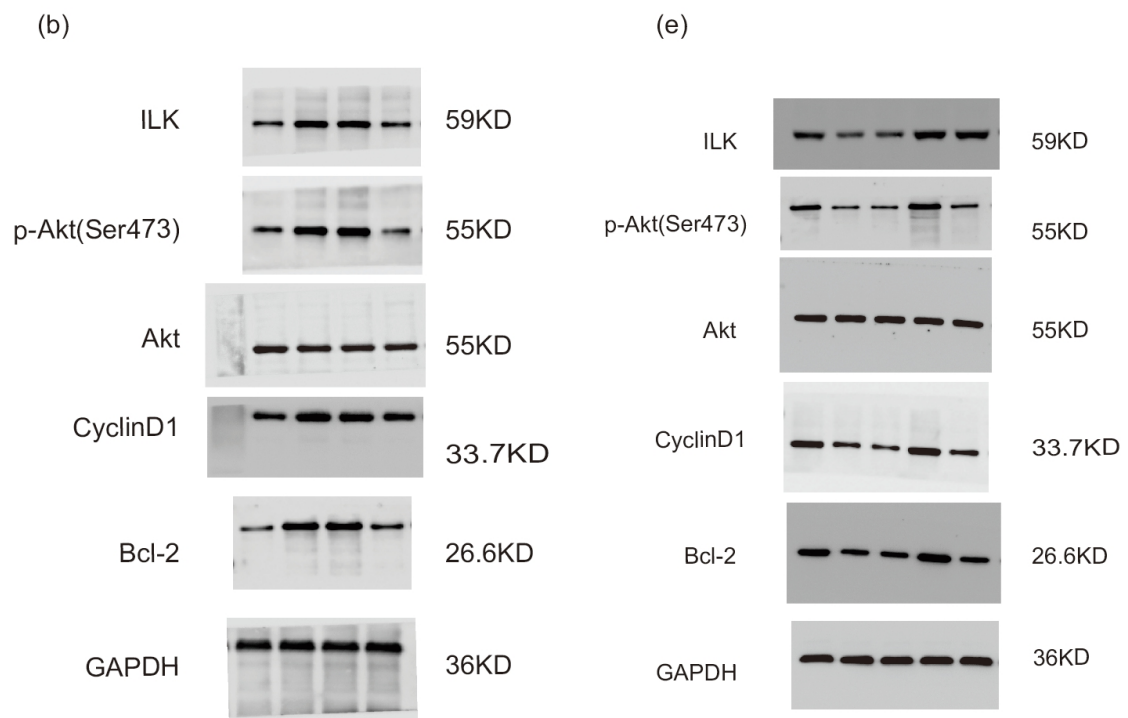

Figure 5

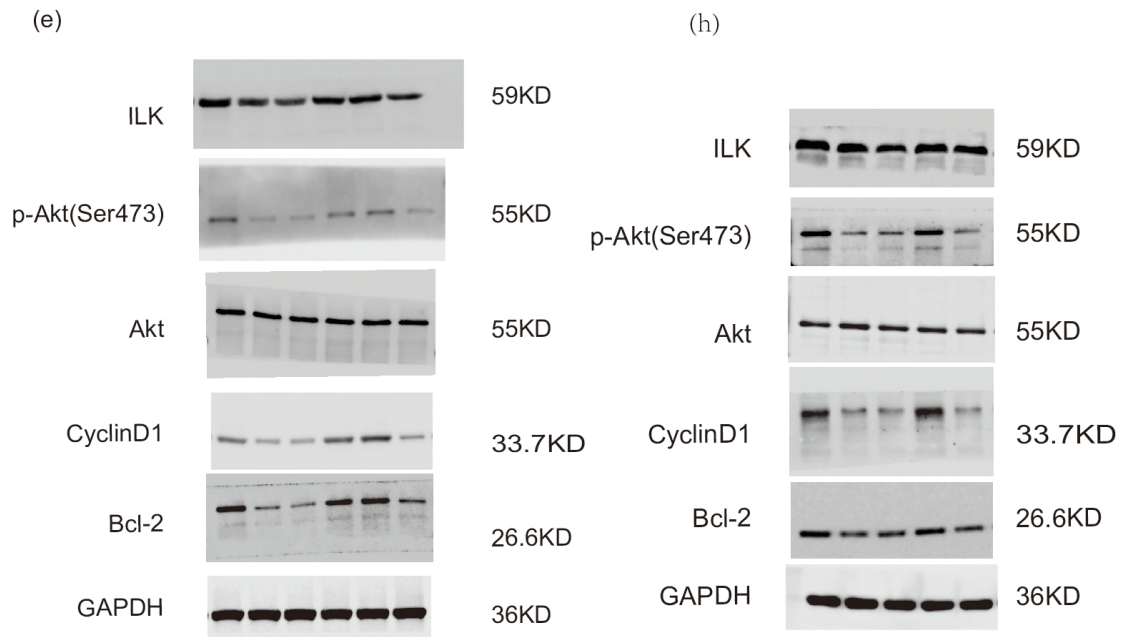

Figure 9

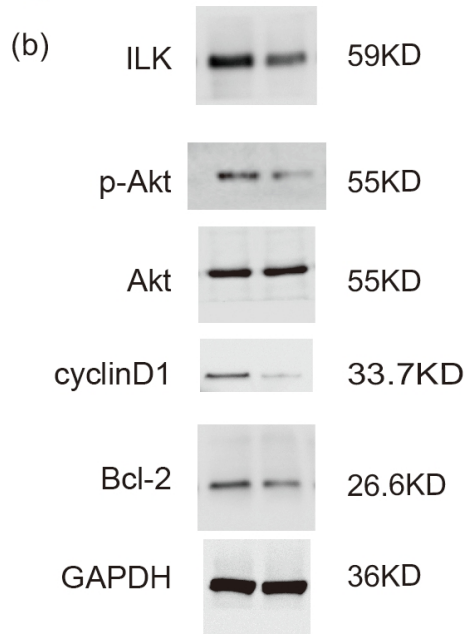

Supplement: 11658_2021_261_MOESM1_ESM.pdf [file 11658_2021_261_MOESM1_ESM.pdf]
